# Supplementary material for: Preparation of Fe3O4 with high specific surface area and improved capacitance as a supercapacitor
Source: Royal Society of Chemistry journal article supplement (doi:10.1039/c3nr00256j), 2013-01-01
Supplement: c3nr00256j.pdf [file c3nr00256j.pdf]

## Electronic Supplementary Information (ESI)

### **Preparation of Fe<sub>3</sub>O<sub>4</sub> with high specific surface area and improved capacitance as supercapacitor**

**Lu Wang,<sup>a</sup> Hongmei Ji,<sup>a</sup> Shasha Wang,<sup>a</sup> Lijuan Kong,<sup>a</sup> Xuefan Jiang<sup>a</sup> and Gang Yang<sup>\*,a,b</sup>**

<sup>a</sup> Jiangsu Laboratory of Advanced Functional Material, Changshu Institute of Technology,  
Changshu 215500, China

<sup>b</sup> School of Material Science and Engineering, Jiangsu University of Science and  
Technology, Zhenjiang 212003, China

\* Corresponding Authors. E-mail: gyang@cslg.edu.cn

Electronic Supplementary Material (ESI) for nanoscale  
 This journal is (c) The Royal Society of Chemistry 2013

**Table S1** Summary of electrochemical measurements reported in recent papers for Fe<sub>3</sub>O<sub>4</sub> supercapacitor electrodes.

| Preparation method                                        | Nature of Fe <sub>3</sub> O <sub>4</sub>                     | Current collector    | Electrolyte                          | The Potential window | Measurement protocol <sup>a</sup>   | Maximum specific capacitance | Capacitance retention after cycle test | Ref (year)  |
|-----------------------------------------------------------|--------------------------------------------------------------|----------------------|--------------------------------------|----------------------|-------------------------------------|------------------------------|----------------------------------------|-------------|
| Electrocoagulation                                        | Powder                                                       | Ti meshes            | 1M                                   | 0-                   | Cp                                  | 27 F g <sup>-1</sup>         | 100% after 10,000 cycles               | [21] (2003) |
|                                                           |                                                              |                      | Na <sub>2</sub> SO <sub>3</sub>      | 1.2V                 | (i = 0.015A g <sup>-1</sup> )       |                              |                                        |             |
| Electroplating                                            | film                                                         | -                    | 1M                                   | -0.8-                | CV                                  | ~170 F g <sup>-1</sup>       | -                                      | [22] (2006) |
|                                                           |                                                              |                      | Na <sub>2</sub> SO <sub>3</sub>      | (-0.1V)              | (v=2mv s <sup>-1</sup> )            |                              |                                        |             |
| Hydrothermal                                              | Film                                                         | Stainless steel foil | 1M Na <sub>2</sub> SO <sub>3</sub>   | -1-0.1V              | I = 0.006A                          | 118.2 F g <sup>-1</sup>      | 88.75% after 500 cycles                | [23] (2009) |
| Microwave method                                          | AC-Fe <sub>3</sub> O <sub>4</sub> , <sup>b</sup><br>Powder   | Nickel grid          | 6M KOH                               | 0-1.2V               | Cp<br>(i=0.5mA cm <sup>-2</sup> )   | 37.9 F g <sup>-1</sup>       | 82% after 500 cycles                   | [24] (2009) |
| Hydrothermal, and treated with pyrrole                    | Powder                                                       | Stainless steel foil | 0.1M Na <sub>2</sub> SO <sub>3</sub> | -1.2-0V              | Cp<br>(i < 0.5 A g <sup>-1</sup> )  | 190 F g <sup>-1</sup>        | ~85% after 500 cycles                  | [25] (2010) |
| Drop-coating technique                                    | film                                                         | Stainless steel foil | 1M Na <sub>2</sub> SO <sub>4</sub>   | 0-1V                 | CV<br>(v=50mv s <sup>-1</sup> )     | 82 F g <sup>-1</sup>         | -                                      | [26] (2010) |
| The electrospinning technique and solvent-thermal process | Powder                                                       | Nickel foam          | 1M Na <sub>2</sub> SO <sub>3</sub>   | -0.9-0.1V            | Cp<br>(i = 0.42 A g <sup>-1</sup> ) | 83 F g <sup>-1</sup>         | 91% after 1000 cycles                  | [27] (2011) |
|                                                           | Fe <sub>3</sub> O <sub>4</sub> /CNFs, <sup>c</sup><br>Powder |                      |                                      |                      |                                     | 135 F g <sup>-1</sup>        | 64% after 1000 cycles                  |             |
| Hydrothermal                                              | Fe <sub>3</sub> O <sub>4</sub> /SnO <sub>2</sub> ,<br>Film   | Ti foil              | 1M                                   | -0.7-                | Cp                                  | ~3.8                         | 82.8% after 2000 cycles                | [28] (2012) |
|                                                           |                                                              |                      | Na <sub>2</sub> SO <sub>3</sub>      | (-0.2V)              | (i=0.5mA cm <sup>-2</sup> )         | mF cm <sup>-2</sup>          |                                        |             |
| Ultrasonic + Hydrothermal                                 | Powder                                                       | Graphite sheet       | 1M Na <sub>2</sub> SO <sub>3</sub>   | -0.9-0.1V            | Cp<br>(i = 0.4 A g <sup>-1</sup> )  | 207.7 F g <sup>-1</sup>      |                                        | This work   |
|                                                           |                                                              |                      |                                      |                      |                                     |                              | (i = 1 A g <sup>-1</sup> )             |             |

<sup>a</sup> CV = Cyclic Voltammetry, Cp = Chronopotentiometry, v = Scan rate, i = Current density, I = Current value.

<sup>b</sup> Activated carbon (AC)-Fe<sub>3</sub>O<sub>4</sub> composite

<sup>c</sup> Carbon nanofibers (CNFs)- Fe<sub>3</sub>O<sub>4</sub> composite
